# Supplementary material
Source: MDPI journal article supplement (https://www.mdpi.com/2410-3888/9/3/93)
Supplement: s1 [file s1]

## Supplementary Materials – Continuation Ratio Logit Model results

Several CR models were tested for each age/cohort using Vector Generalized Linear Models (VGLM) and Vector Generalized Additive Models (VGAM) with increased complexity, these models can be written as follows:

$$\text{logit } P(Y = a|Y \geq a) = \alpha_a + \beta_a \text{Julian week} \quad (1)$$

$$\text{logit } P(Y = a|Y \geq a) = \alpha_a + \beta_1 \text{Julian week} + \beta_{2,a} \text{area} \quad (2)$$

$$\text{logit } P(Y = a|Y \geq a) = \alpha_a + \beta_{1,a} \text{Julian week} + \beta_{2,a} \text{area} + \beta_{3,a} \text{depth} \quad (3)$$

$$\text{logit } P(Y = a|Y \geq a) = \alpha_a + s_a(\text{Julian week}) + \beta_{1,a} \text{area} + \beta_{2,a} \text{depth} \quad (4)$$

$$\text{logit } P(Y = a|Y \geq a) = \alpha_a + \beta_{1,a} \text{Julian week} + \beta_{2,a} \text{area} + s_a(\text{depth}) \quad (5)$$

$$\text{logit } P(Y = a|Y \geq a) = \alpha_a + \beta_a \text{area} + s_a(\text{Julian week}) + s(\text{depth}) \quad (6)$$

**Table S1.** Summary of CR models tested with VGLM and VGAM functions. Model structure summarizes the predictor variables included at each step specifying if the linear predictor depends on a smooth function. The number of estimated parameters, deviance explained (1 - deviance/null deviance) and the "AIC decrease" represents the decrease in AIC compared to Model 1 at each step.

| Modelling functions | Model structure                                                                           | Model | Number parameters | Deviance explained | AIC decrease |
|---------------------|-------------------------------------------------------------------------------------------|-------|-------------------|--------------------|--------------|
| VGLM                | time (week)                                                                               | 1     | 18                | 0.14               | 0            |
|                     | time (week) + spatial (area)<br>Non-parallel effects                                      | 2     | 27                | 0.92               | 308628       |
|                     | time (week) + spatial (area + depth)<br>Non-parallel effects                              | 3     | 36                | 1.07               | 367463       |
| VGAM                | time (s(week)) + spatial (area + depth)<br>Non-parallel effects                           | 4     | 53.7              | 1.26               | 444201       |
|                     | time (week) + spatial (area + s(depth))<br>Non-parallel effects                           | 5     | 53                | 1.27               | 448275       |
|                     | spatial (area) + time (s(week)) + spatial (s(depth))<br>partial parallel effects in depth | 6     | 47.6              | 1.36               | 483642       |

Table S2. Detailed results of the VGAM function for the selected Model 6. Parameter estimates, significance and model diagnostics (combined outputs from several VGAM functions).

```
vgam(formula = cbind(age1, age2, age3, age4, age5, age6, age7, age8, age9, age10)
~ area + s(jweek)+ s(depth), family = sratio(parallel = TRUE ~ s(depth)), data =
horsemackerel)
```

Names of predictors: logitlink(P[Y=1|Y>=1]), logitlink(P[Y=2|Y>=2]),  
logitlink(P[Y=3|Y>=3]), logitlink(P[Y=4|Y>=4]), logitlink(P[Y=5|Y>=5]),  
logitlink(P[Y=6|Y>=6]), logitlink(P[Y=7|Y>=7]), logitlink(P[Y=8|Y>=8]),  
logitlink(P[Y=9|Y>=9])

Parametric coefficients:

|               | Estimate   | Std. Error | z value | p-value    |
|---------------|------------|------------|---------|------------|
| (Intercept):1 | -1.237e+00 | 2.847e-03  | -434.70 | <2e-16 *** |
| (Intercept):2 | -8.097e-01 | 2.827e-03  | -286.39 | <2e-16 *** |
| (Intercept):3 | -4.799e-01 | 2.901e-03  | -165.43 | <2e-16 *** |
| (Intercept):4 | -4.438e-01 | 3.128e-03  | -141.91 | <2e-16 *** |
| (Intercept):5 | -3.456e-01 | 3.501e-03  | -98.73  | <2e-16 *** |
| (Intercept):6 | -3.432e-01 | 4.006e-03  | -85.67  | <2e-16 *** |
| (Intercept):7 | -3.216e-01 | 4.430e-03  | -72.60  | <2e-16 *** |
| (Intercept):8 | 1.264e-01  | 4.897e-03  | 25.81   | <2e-16 *** |
| (Intercept):9 | 1.049e+00  | 6.259e-03  | 167.52  | <2e-16 *** |
| areaSW:1      | -4.703e-01 | 2.208e-03  | -212.99 | <2e-16 *** |
| areaSW:2      | -4.153e-01 | 2.057e-03  | -201.93 | <2e-16 *** |
| areaSW:3      | -1.792e-01 | 2.043e-03  | -87.72  | <2e-16 *** |
| areaSW:4      | 1.869e-01  | 2.237e-03  | 83.55   | <2e-16 *** |
| areaSW:5      | 3.917e-01  | 2.648e-03  | 147.95  | <2e-16 *** |
| areaSW:6      | 3.336e-01  | 3.205e-03  | 104.11  | <2e-16 *** |
| areaSW:7      | 2.051e-01  | 3.578e-03  | 57.34   | <2e-16 *** |
| areaSW:8      | 2.827e-01  | 4.020e-03  | 70.32   | <2e-16 *** |
| areaSW:9      | 3.122e-01  | 5.277e-03  | 59.16   | <2e-16 *** |

---  
Signif. codes: 0 '\*\*\*' 0.001 '\*\*' 0.01 '\*' 0.05 '.' 0.1 ' ' 1

Approximate significance of smooth terms:

|            | edf | Chi.sq | p-value      |
|------------|-----|--------|--------------|
| s(jweek):1 | 2   | 13041  | <2.2e-16 *** |
| s(jweek):2 | 2   | 6260   | <2.2e-16 *** |
| s(jweek):3 | 2   | 3331   | <2.2e-16 *** |
| s(jweek):4 | 2   | 261    | <2.2e-16 *** |
| s(jweek):5 | 1.9 | 5048   | <2.2e-16 *** |
| s(jweek):6 | 1.9 | 7443   | <2.2e-16 *** |
| s(jweek):7 | 2   | 524    | <2.2e-16 *** |
| s(jweek):8 | 2   | 671    | <2.2e-16 *** |
| s(jweek):9 | 2   | 1568   | <2.2e-16 *** |
| s(depth)   | 2   | 104859 | <2.2e-16 *** |

---  
Signif. codes: 0 '\*\*\*' 0.001 '\*\*' 0.01 '\*' 0.05 '.' 0.1 ' ' 1

Residual deviance: 39122637 on 103983 degrees of freedom

Log-likelihood: -19561319 on 103983 degrees of freedom

Number of Fisher scoring iterations: 8

No Hauck-Donner effect found in any of the estimates

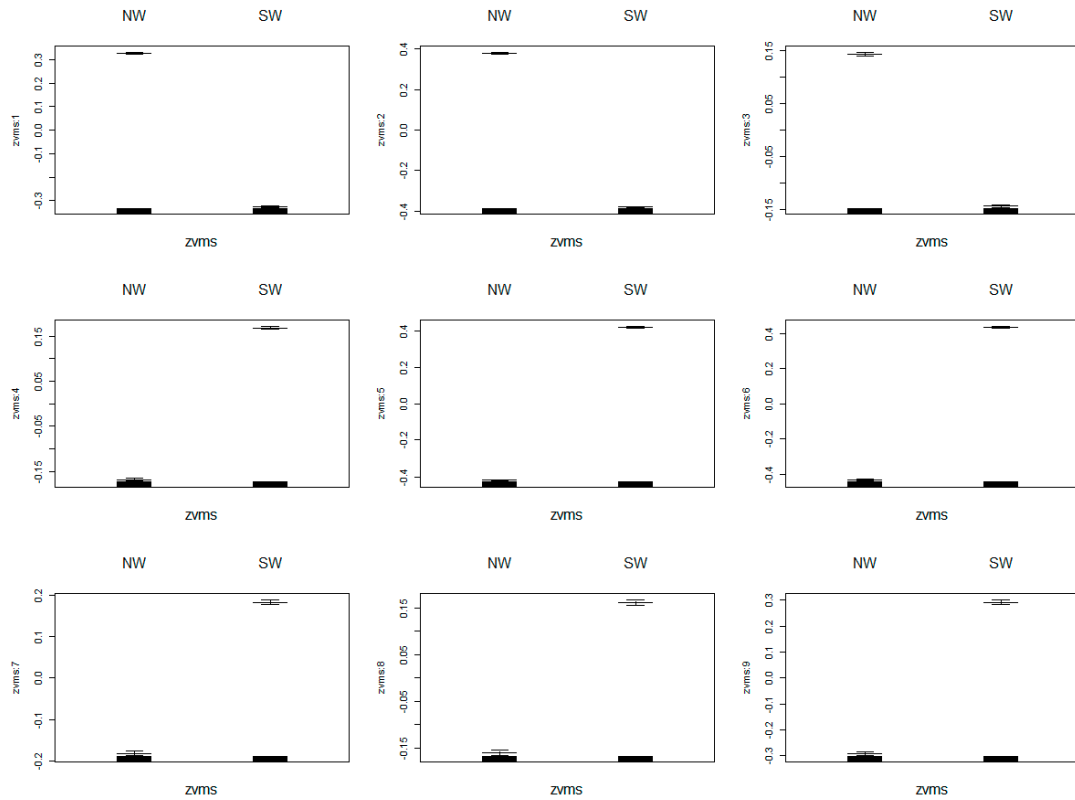

**Figure S9** – Partial effect for categorical variable *area* for each level of the response variable (logitlinkP[age=1|age>=1],...,logitlinkP[age=9|age>=9] from top left to the bottom right).

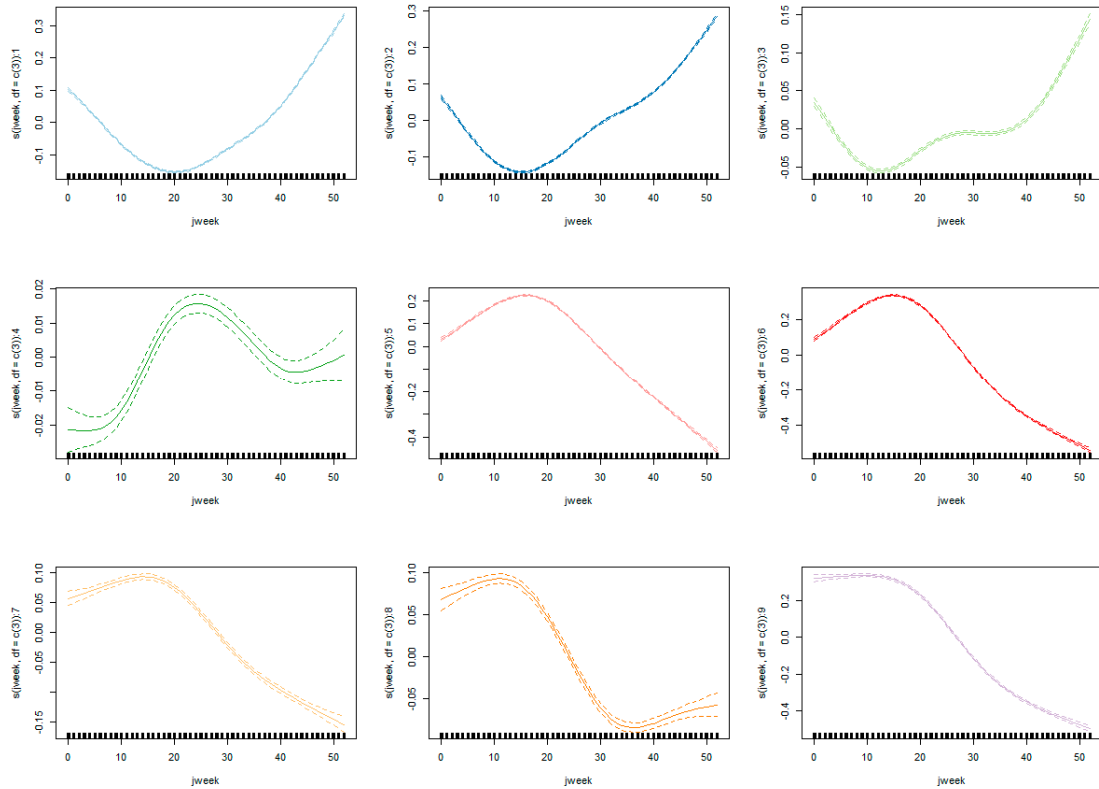

**Figure S10** – Partial effect for variable *Julian week* for each level of the response variable (logitlinkP[age=1|age>=1],...,logitlinkP[age=9|age>=9] from top left to the bottom right).

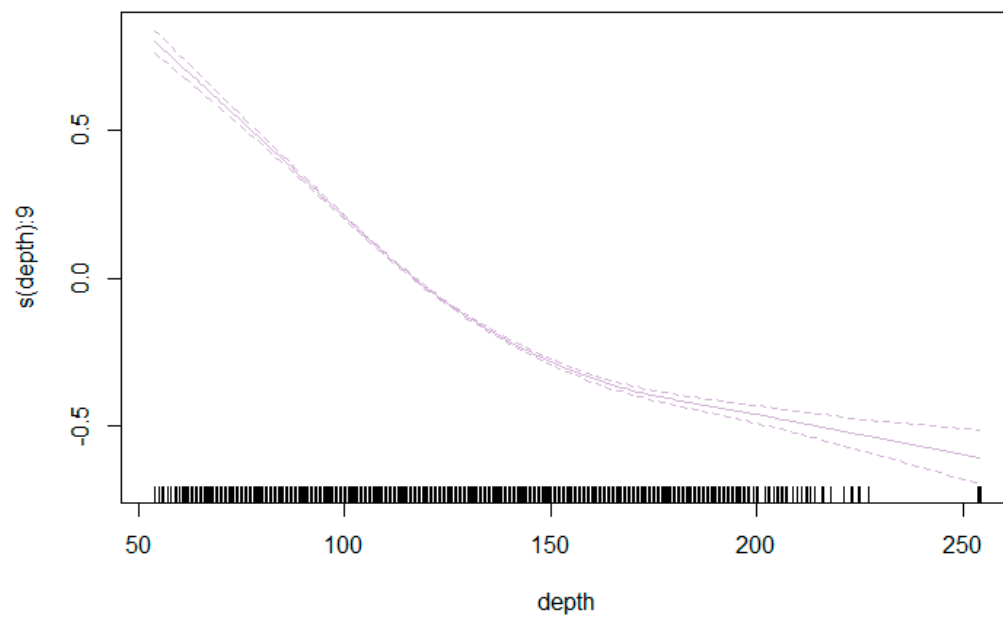

**Figure S11** – Partial effect for variable *depth* for each level of the response variable (parallel effect for all levels of  $\text{logitlink}(P[\text{age}=\text{a} \mid \text{age} \geq \text{a}])$ )
